# Supplementary material for: Obesity associates with vasomotor symptoms in postmenopause but with physical symptoms in perimenopause: a cross-sectional study
Source: PubMed Central journal article supplement (PMC5721621; doi:10.1186/s12905-017-0487-7), 2017-12-08
Supplement: 12905_2017_487_MOESM2_ESM.pdf [file 12905_2017_487_MOESM2_ESM.pdf]

## 갱년기(폐경기) 여성건강 실태조사

다음 설문지는 만 45세-55세 사이의 중년 여성들에게 폐경기에 관한 인식 및 정보요구도, 증상, 지식, 태도, 관리에 대해 묻고 있습니다.

아래 용어 정의를 참조하시고, 각 질문에 대한 응답을 적절히 선택해 주시기 바랍니다.

### 용어 정의

✓ **폐경:** 마지막 월경일로부터 1년이 지난 시점으로, 영구적으로 월경의 종단을 의미함

✓ **폐경기:** 폐경 주변기, 폐경 후를 통틀어서 말함

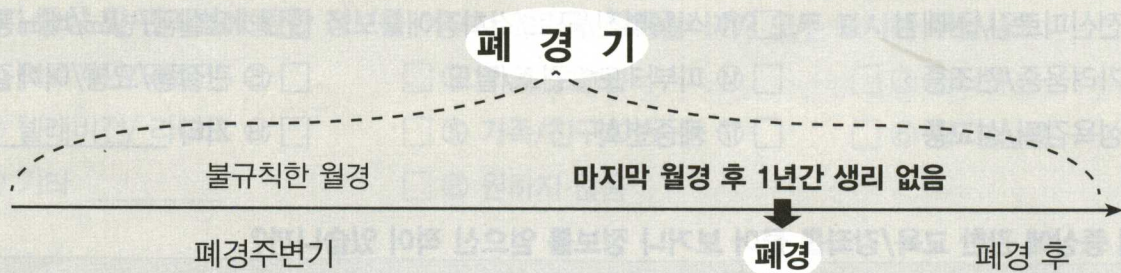

1. 다음은 지난 1년간 월경(생리) 주기에 대한 질문입니다.

|                      |                                    |                                                                                                              |
|----------------------|------------------------------------|--------------------------------------------------------------------------------------------------------------|
| 지난 1년간 생리를 한적이 있습니까? | <input type="checkbox"/> 한번도 없었다   | 지난 1년간 임신, 출산이나 수유를 한적이 있습니까?<br><input type="checkbox"/> 1) 예 <input type="checkbox"/> 2) 아니오               |
|                      | <input type="checkbox"/> 1번 이상 있었다 | 지난 1년간 7일 이상 차이가 나는 생리주기를 경험한 적이 있습니까?<br><input type="checkbox"/> 1) 예 ___번 <input type="checkbox"/> 2) 아니오 |
|                      |                                    | 지난 1년간 60일 이상 생리를 거른 적이 1번 이상 있습니까?<br><input type="checkbox"/> 1) 예 ___번 <input type="checkbox"/> 2) 아니오    |

2. 출산경험 (정상출산, 조산 등 모두 포함)이 있습니까?

예  아니오

2-1. 첫 출산과 마지막 출산은 언제였습니까?

첫 출산 연령 : 만   세

마지막 출산 연령 만   세

▣ 다음은 폐경기 인식 및 정보 요구도를 알아보려고 합니다. 각 문항을 잘 읽고 귀하가 알고 있는 대로 표시(✓)해 주십시오.

**1. 폐경에 대해 얼마나 걱정하십니까?**

- ① 전혀 걱정하지 않는다       ② 걱정하지 않는다       ③ 걱정한다       ④ 매우 걱정한다

**2. 다음 중 폐경기 증상을 아는 대로 모두 표시해 주십시오**

- |                                       |                                         |                                        |
|---------------------------------------|-----------------------------------------|----------------------------------------|
| <input type="checkbox"/> ① 안면홍조       | <input type="checkbox"/> ② 손발에 열이 남     | <input type="checkbox"/> ③ 식은땀/발한      |
| <input type="checkbox"/> ④ 가슴답답함/두근거림 | <input type="checkbox"/> ⑤ 두통/어지러움      | <input type="checkbox"/> ⑥ 불안/초조/신경질   |
| <input type="checkbox"/> ⑦ 이명/난청      | <input type="checkbox"/> ⑧ 불면증/우울증      | <input type="checkbox"/> ⑨ 기억력 장애/건망증  |
| <input type="checkbox"/> ⑩ 전신피로감/권태감  | <input type="checkbox"/> ⑪ 식욕부진/구토/소화장애 | <input type="checkbox"/> ⑫ 요실금/빈뇨/배뇨통  |
| <input type="checkbox"/> ⑬ 가려움증/건조증   | <input type="checkbox"/> ⑭ 피부·모발 건조/탈모  | <input type="checkbox"/> ⑮ 관절통/요통/어깨결림 |
| <input type="checkbox"/> ⑯ 성욕감퇴/성교통   | <input type="checkbox"/> ⑰ 체중변화         | <input type="checkbox"/> ⑱ 기타 _____    |

**3. 폐경기 증상에 관한 교육/강좌를 들어 보거나 정보를 얻으신 적이 있습니까?**

- ① 있다 (3-1번으로 가십시오)       ② 없다 (4번으로 가십시오)

**3-1. 폐경기 증상에 관한 정보를 받으신 시기는 주로 언제입니까?**

- ① 폐경 전 (현재 월경이 비교적 규칙적인 경우)  
 ② 폐경 주변기 (월경주기가 불규칙하면서 1년 이내 월경이 있는 경우)  
 ③ 폐경 후 (마지막 월경이 1년 이상 경과된 경우)

**3-2. 다음 매체 중 정보를 얻으신 경로를 모두 표시해 주십시오**

- |                                      |                                       |                                |
|--------------------------------------|---------------------------------------|--------------------------------|
| <input type="checkbox"/> ① 의료기관/의료인  | <input type="checkbox"/> ② 지역 보건센터    | <input type="checkbox"/> ③ 인터넷 |
| <input type="checkbox"/> ④ 텔레비전/ 라디오 | <input type="checkbox"/> ⑤ 가족/친구/이웃 등 |                                |
| <input type="checkbox"/> ⑥ 잡지/신문     | <input type="checkbox"/> ⑦ 기타 _____   |                                |

**3-3. 폐경기 증상에 관해 받으신 정보에 대해서 만족하십니까?**

- ① 매우 불만족       ② 불만족       ③ 만족       ④ 매우 만족

**4. 폐경기 관련 정보 중 필요한 것을 모두 표시해 주십시오.**

- ① 폐경기 증상에 관한 정보
- ② 폐경과 관련된 주요질병에 관한 정보 (예. 골다공증, 심혈관 질환, 비만)
- ③ 폐경기관리에 도움이 되는 생활습관에 관한 정보 (예. 흡연, 음주, 체중조절, 수면 등)
- ④ 보완대체요법에 관한 정보(예. 단전호흡, 마사지, 한약, 영양제, 보조식품 등)
- ⑤ 호르몬 치료에 관한 정보
- ⑥ 폐경기 증후군 진단을 위한 검사에 관한 정보
- ⑦ 부부 성생활 관련 정보
- ⑧ 기타 \_\_\_\_\_
- ⑨ 없음

**5. 폐경기 증상 및 관리법에 관한 정보를 어디서 얻기를 원하십니까? 모두 표시해 주십시오**

- ① 의료기관/의료인
- ② 지역 보건센터
- ③ 인터넷
- ④ 텔레비전/ 라디오
- ⑤ 가족/친구/이웃 등
- ⑥ 잡지/신문
- ⑦ 기타 \_\_\_\_\_
- ⑧ 원하지 않음

■ 다음은 폐경기 증상의 치료법 중 하나인 **호르몬 치료**에 대한 질문입니다.  
각 문항을 잘 읽고 귀하가 생각하신 대로 표시(✓)해 주십시오.

**6. 폐경기 증상의 치료법 중 하나인 호르몬 치료에 대해 어느 정도 알고 있습니까?**

- ① 전혀 모른다
- ② 모른다
- ③ 알고 있다
- ④ 매우 잘 알고 있다

**7. 호르몬 치료에 대한 교육/강좌를 들어 보거나 정보를 얻은 적이 있습니까?**

- ① 있다 (7-1번으로 가십시오)
- ② 없다 (8번으로 가십시오)

**7-1. 호르몬 치료에 대한 정보를 얻으신 시기는 주로 언제입니까?**

- ① 폐경 전 (현재 월경이 비교적 규칙적인 경우)
- ② 폐경 주변기 (월경주기가 불규칙하면서 1년 이내 월경이 있는 경우)
- ③ 폐경 후 (마지막 월경이 1년 이상 경과된 경우)

**7-2. 다음 매체 중 호르몬 치료에 대한 정보를 얻으신 경로를 모두 표시해 주십시오**

- ① 의료기관/의료인
- ② 지역 보건센터
- ③ 인터넷
- ④ 텔레비전/ 라디오
- ⑤ 가족/친구/이웃 등
- ⑥ 잡지/신문
- ⑦ 기타 \_\_\_\_\_

**7-3. 받으신 정보에 대해서 만족하십니까?**

- ① 매우 불만족
- ② 불만족
- ③ 만족
- ④ 매우 만족





▣ 다음은 **폐경기에 관한 설명**입니다. 각 문항을 잘 읽고 귀하가 알고 있는 대로 표시(✓)해 주십시오.

|    | 문항                                                 | 예                        | 아니오                      | 모르겠다                     |
|----|----------------------------------------------------|--------------------------|--------------------------|--------------------------|
| 1  | 폐경기 동안 난소에서는 여성호르몬 분비가 증가한다.                       | <input type="checkbox"/> | <input type="checkbox"/> | <input type="checkbox"/> |
| 2  | 대부분의 여성은 폐경기 동안 불편함을 경험하지 않는다.                     | <input type="checkbox"/> | <input type="checkbox"/> | <input type="checkbox"/> |
| 3  | 폐경기는 평균연령 45세에 온다.                                 | <input type="checkbox"/> | <input type="checkbox"/> | <input type="checkbox"/> |
| 4  | 에스트로겐 호르몬의 사용은 일반적으로 폐경의 증상을 없앤다.                  | <input type="checkbox"/> | <input type="checkbox"/> | <input type="checkbox"/> |
| 5  | 55세가 되면 모든 여성은 폐경이 된다.                             | <input type="checkbox"/> | <input type="checkbox"/> | <input type="checkbox"/> |
| 6  | 폐경기 동안 외부 생식기는 조여들고 질 분비물이 마른다.                    | <input type="checkbox"/> | <input type="checkbox"/> | <input type="checkbox"/> |
| 7  | 폐경기 동안 월경량은 줄어들고 월경일수가 점점 짧아진다.                    | <input type="checkbox"/> | <input type="checkbox"/> | <input type="checkbox"/> |
| 8  | 폐경기 동안 월경이 불규칙해진다.                                 | <input type="checkbox"/> | <input type="checkbox"/> | <input type="checkbox"/> |
| 9  | 폐경기 동안 어떤 여성들은 불안, 흥분, 우울, 신경과민증을 경험한다.            | <input type="checkbox"/> | <input type="checkbox"/> | <input type="checkbox"/> |
| 10 | 폐경 때문에 정신이상에 걸릴 위험성이 훨씬 높다.                        | <input type="checkbox"/> | <input type="checkbox"/> | <input type="checkbox"/> |
| 11 | 폐경 이후에는 골다공증이 올 가능성이 증가한다.                         | <input type="checkbox"/> | <input type="checkbox"/> | <input type="checkbox"/> |
| 12 | 폐경 이후에는 심혈관 질환에 걸릴 가능성이 증가한다.                      | <input type="checkbox"/> | <input type="checkbox"/> | <input type="checkbox"/> |
| 13 | 폐경 이후에는 더 이상 임신할 수 없다.                             | <input type="checkbox"/> | <input type="checkbox"/> | <input type="checkbox"/> |
| 14 | 화끈거림, 얼굴, 목, 가슴에서 흐르는 식은땀은 폐경기 중에 일어나는 가장 흔한 증상이다. | <input type="checkbox"/> | <input type="checkbox"/> | <input type="checkbox"/> |
| 15 | 폐경 이후에는 배뇨장애, 요실금 등이 일어날 수 있다.                     | <input type="checkbox"/> | <input type="checkbox"/> | <input type="checkbox"/> |
| 16 | 폐경 이후에는 관절통, 허리통증이 일어날 수 있다.                       | <input type="checkbox"/> | <input type="checkbox"/> | <input type="checkbox"/> |

▣ 다음은 귀하의 **폐경에 대한 태도**를 알아보려고 하는 문항입니다.

아래를 읽고 귀하의 생각과 가장 가깝다고 생각하는 정도에 표시(✓)해 주십시오.

| 문항 |                                                    | 전혀<br>그렇지<br>않다          | 그렇지<br>않다                | 조금<br>그렇다                | 매우<br>그렇다                |
|----|----------------------------------------------------|--------------------------|--------------------------|--------------------------|--------------------------|
| 1  | 여성들에게 폐경은 유쾌하지 않은 경험이다                             | <input type="checkbox"/> | <input type="checkbox"/> | <input type="checkbox"/> | <input type="checkbox"/> |
| 2  | 여성들이 폐경을 싫어하는 것은 당연하다                              | <input type="checkbox"/> | <input type="checkbox"/> | <input type="checkbox"/> | <input type="checkbox"/> |
| 3  | 폐경이 되면 폐경에 따른 문제가 있을 것이라고 생각한다                     | <input type="checkbox"/> | <input type="checkbox"/> | <input type="checkbox"/> | <input type="checkbox"/> |
| 4  | 폐경경험은 여성들을 혼란스럽게 만든다고 생각한다                         | <input type="checkbox"/> | <input type="checkbox"/> | <input type="checkbox"/> | <input type="checkbox"/> |
| 5  | 폐경이 되면 여성들은 의기소침해질 것이라고 생각한다                       | <input type="checkbox"/> | <input type="checkbox"/> | <input type="checkbox"/> | <input type="checkbox"/> |
| 6  | 폐경이 되면 여성들은 우울해질 것이라고 생각한다                         | <input type="checkbox"/> | <input type="checkbox"/> | <input type="checkbox"/> | <input type="checkbox"/> |
| 7  | 폐경이 되면 여성들은 폐경전보다 기분이 좋아질 것이라 생각한다                 | <input type="checkbox"/> | <input type="checkbox"/> | <input type="checkbox"/> | <input type="checkbox"/> |
| 8  | 폐경을 경험하면서 여성들은 인생에 대해 더 넓은 견해를 갖게 될 것이라 생각한다       | <input type="checkbox"/> | <input type="checkbox"/> | <input type="checkbox"/> | <input type="checkbox"/> |
| 9  | 폐경이 되면 여성들은 자신감이 커질 것이라 생각한다                       | <input type="checkbox"/> | <input type="checkbox"/> | <input type="checkbox"/> | <input type="checkbox"/> |
| 10 | 폐경이 되면 여성들은 폐경전보다 평온하고 행복해질 것이라 생각한다               | <input type="checkbox"/> | <input type="checkbox"/> | <input type="checkbox"/> | <input type="checkbox"/> |
| 11 | 폐경이 되면 여성들은 인생이 더 살맛나게 느껴질 것이라 생각한다                | <input type="checkbox"/> | <input type="checkbox"/> | <input type="checkbox"/> | <input type="checkbox"/> |
| 12 | 폐경이 되면 여성들은 자기 자신을 위해 더 자유롭게 일을 할 것이라 생각한다         | <input type="checkbox"/> | <input type="checkbox"/> | <input type="checkbox"/> | <input type="checkbox"/> |
| 13 | 폐경후 여성들은 남편과의 관계가 더 좋아질 것이라 생각한다                   | <input type="checkbox"/> | <input type="checkbox"/> | <input type="checkbox"/> | <input type="checkbox"/> |
| 14 | 여성들은 폐경을 지금까지 자신에게 일어난 일 중 가장 좋은 일이라고 생각할 것이라 생각한다 | <input type="checkbox"/> | <input type="checkbox"/> | <input type="checkbox"/> | <input type="checkbox"/> |

|    | 문항                                                        | 전혀<br>그렇지<br>않다          | 그렇지<br>않다                | 조금<br>그렇다                | 매우<br>그렇다                |
|----|-----------------------------------------------------------|--------------------------|--------------------------|--------------------------|--------------------------|
| 15 | 폐경이 되면 여성들은 전보다 주변 일에 더 관심을 갖게 될 것이라 생각한다                 | <input type="checkbox"/> | <input type="checkbox"/> | <input type="checkbox"/> | <input type="checkbox"/> |
| 16 | 폐경으로 몸의 변화가 있기는 하지만 그렇게 많은 변화가 있는 것은 아니라 생각한다             | <input type="checkbox"/> | <input type="checkbox"/> | <input type="checkbox"/> | <input type="checkbox"/> |
| 17 | 폐경전과 폐경후의 차이는 단지 월경을 하느냐 안 하느냐의 차이일 뿐 다른 의미는 없다고 생각한다.    | <input type="checkbox"/> | <input type="checkbox"/> | <input type="checkbox"/> | <input type="checkbox"/> |
| 18 | 폐경이 되는 것은 여성에게 그렇게 중요한 측면이 변하는 것은 아니라 생각한다                | <input type="checkbox"/> | <input type="checkbox"/> | <input type="checkbox"/> | <input type="checkbox"/> |
| 19 | 폐경으로 고통을 겪는 여성들은 보통 시간이 많은 한가한 사람들이라고 생각한다                | <input type="checkbox"/> | <input type="checkbox"/> | <input type="checkbox"/> | <input type="checkbox"/> |
| 20 | 폐경으로 고통을 겪는 여성들은 평소에 폐경이 되면 어려움이 있을 것이라고 생각해 온 사람들이라 생각한다 | <input type="checkbox"/> | <input type="checkbox"/> | <input type="checkbox"/> | <input type="checkbox"/> |
| 21 | 폐경으로 인한 고통은 여성 스스로가 신체 변화에 대한 통제력이 없다는 것을 의미한다고 생각한다      | <input type="checkbox"/> | <input type="checkbox"/> | <input type="checkbox"/> | <input type="checkbox"/> |
| 22 | 폐경이 되면 여성들은 자기중심적이 된다고 생각한다                               | <input type="checkbox"/> | <input type="checkbox"/> | <input type="checkbox"/> | <input type="checkbox"/> |
| 23 | 폐경이 되면 대부분의 여성들은 이제 나는 진짜 여자가 아니라는 생각을 한다                 | <input type="checkbox"/> | <input type="checkbox"/> | <input type="checkbox"/> | <input type="checkbox"/> |
| 24 | 여성들은 폐경이 된 것을 사람들의 관심을 끌기 위한 하나의 구실로 사용한다고 생각한다           | <input type="checkbox"/> | <input type="checkbox"/> | <input type="checkbox"/> | <input type="checkbox"/> |
| 25 | 폐경이 되면 여성들은 허전함을 느낄까봐 걱정할 것이라고 생각한다                       | <input type="checkbox"/> | <input type="checkbox"/> | <input type="checkbox"/> | <input type="checkbox"/> |
| 26 | 폐경은 여성으로 하여금 자신도 이해할 수 없는 이상한 행동을 하게 하는 경향이 있다고 생각한다      | <input type="checkbox"/> | <input type="checkbox"/> | <input type="checkbox"/> | <input type="checkbox"/> |
| 27 | 폐경경험은 여성들이 이해하기 어려운 신비로운 일이라고 생각한다                        | <input type="checkbox"/> | <input type="checkbox"/> | <input type="checkbox"/> | <input type="checkbox"/> |



▣ 다음은 **폐경기관리와 관련된 호르몬치료 및 보완대체요법**에 대해 알아보하고자 하는 문항입니다.

**1. 폐경기에 접어들면서 불편을 느끼는 점을 모두 표시해 주십시오.**

- |                                                 |                                                   |
|-------------------------------------------------|---------------------------------------------------|
| <input type="checkbox"/> ① 안면홍조 등 다양한 신체적 증상    | <input type="checkbox"/> ② 신경질, 불면증, 우울증 등 정신적 증상 |
| <input type="checkbox"/> ③ 원활하지 못한 부부 성생활       | <input type="checkbox"/> ④ 다양한 만성질환 발생            |
| <input type="checkbox"/> ⑤ 향후 치매 발병에 대한 우려      | <input type="checkbox"/> ⑥ 기억력과 집중력 저하            |
| <input type="checkbox"/> ⑦ 가정/사회에서 역할변화 적응의 어려움 | <input type="checkbox"/> ⑧ 기타 _____               |
| <input type="checkbox"/> ⑨ 해당 없음                |                                                   |

**2. 폐경기 증상으로 인해 병원에 방문한 적이 있습니까?**

- ① 있다 (☞ 2-1번으로 가십시오)       ② 없다 (☞ 3번으로 가십시오)

**2-1. 만일 있다면 어느 과로 내원하셨습니까? (모두 표시해 주십시오)**

- |                                 |                                     |                                     |
|---------------------------------|-------------------------------------|-------------------------------------|
| <input type="checkbox"/> ① 산부인과 | <input type="checkbox"/> ② 가정의학과    | <input type="checkbox"/> ③ 내분비 내과   |
| <input type="checkbox"/> ④ 피부과  | <input type="checkbox"/> ⑤ 비뇨기과     | <input type="checkbox"/> ⑥ 정신건강 의학과 |
| <input type="checkbox"/> ⑦ 한방병원 | <input type="checkbox"/> ⑧ 기타 _____ |                                     |

**2-2. 병원 방문 당시 있었던 주요 증상을 모두 표시해 주십시오**

- |                                       |                                         |                                        |
|---------------------------------------|-----------------------------------------|----------------------------------------|
| <input type="checkbox"/> ① 안면홍조       | <input type="checkbox"/> ② 손발에 열이 남     | <input type="checkbox"/> ③ 식은땀/발한      |
| <input type="checkbox"/> ④ 가슴답답함/두근거림 | <input type="checkbox"/> ⑤ 두통/어지러움      | <input type="checkbox"/> ⑥ 불안/초조/신경질   |
| <input type="checkbox"/> ⑦ 이명/난청      | <input type="checkbox"/> ⑧ 불면증/우울증      | <input type="checkbox"/> ⑨ 기억력 장애/건망증  |
| <input type="checkbox"/> ⑩ 전신피로감/권태감  | <input type="checkbox"/> ⑪ 식욕부진/구토/소화장애 | <input type="checkbox"/> ⑫ 요실금/빈뇨/배뇨통  |
| <input type="checkbox"/> ⑬ 가려움증/건조증   | <input type="checkbox"/> ⑭ 피부·모발건조/탈모   | <input type="checkbox"/> ⑮ 관절통/요통/어깨결림 |
| <input type="checkbox"/> ⑯ 성욕감퇴/성교통   | <input type="checkbox"/> ⑰ 체중변화         | <input type="checkbox"/> ⑱ 기타 _____    |

**3. 폐경기 증상완화를 목적으로 호르몬 치료를 의료진으로부터 권유 받은 적이 있습니까?**

- ① 예       ② 아니오

**4. 폐경기 증상완화를 목적으로 호르몬 치료를 받으신 적이 있습니까?**

- ① 예 (☞ 4-1번으로 가십시오)  
 ② 아니오 (☞ 5번으로 가십시오)

**4-1. 어느 진료과로부터 처방을 받았습니까? (모두 표시해 주십시오)**

- ① 산부인과                       ② 가정의학과                       ③ 내분비 내과  
 ④ 피부과                               ⑤ 비뇨기과                               ⑥ 정신건강 의학과  
 ⑦ 한방병원                               ⑧ 기타 \_\_\_\_\_

**4-2. 의사는 호르몬치료를 어떻게 설명하셨습니다?**

- ① 부작용보다 이점에 대한 설명을 주로 하였다.  
 ② 이점보다는 부작용에 대한 설명을 주로 하였다.  
 ③ 부작용과 이점을 동일하게 설명하였다.  
 ④ 구체적으로 설명 하지 않았다.  
 ⑤ 기타 \_\_\_\_\_

**4-3. 현재도 호르몬 치료를 받고 계십니까?**     ① 예                                       ② 아니오

**4-4. 처음으로 호르몬 치료를 시작한 시기는 언제입니까?**    만 \_\_\_\_\_ 세

**4-5. 호르몬 치료는 얼마 동안 받으셨습니까?**    \_\_\_\_\_ 년 \_\_\_\_\_ 개월

**4-6. 다음 중 사용하셨던 호르몬 형태를 모두 표시해 주십시오**

- ① 경구용                       ② 주사제                       ③ 크림 또는 겔                       ④ 패치

**4-7. 호르몬 치료가 폐경증상 완화 및 전반적인 건강 증진에 도움이 되었다고 생각하십니까?**

- ① 전혀 도움이 되지 않았다                       ② 도움이 되지 않았다  
 ③ 도움이 되었다                                       ④ 매우 도움이 되었다

**4-8. 호르몬 치료 후 완화된 증상을 모두 표시해 주십시오**

- ① 안면홍조                       ② 손발에 열이 남                       ③ 식은땀/발한  
 ④ 가슴답답함/두근거림                       ⑤ 두통/어지러움                       ⑥ 불안/초조/신경질  
 ⑦ 이명/난청                       ⑧ 불면증/우울증                       ⑨ 기억력 장애/건망증  
 ⑩ 전신피로감/권태감                       ⑪ 식욕부진/구토/소화장애                       ⑫ 요실금/빈뇨/배뇨통  
 ⑬ 가려움증/건조증                       ⑭ 피부·모발건조/탈모                       ⑮ 관절통/요통/어깨결림  
 ⑯ 성욕감퇴/성교통                       ⑰ 체중변화                       ⑱ 기타 \_\_\_\_\_

**4-9. 호르몬 치료를 중단 하셨다면, 중단 이유는 무엇입니까? 모두 표시해 주십시오**

- ① 부작용 때문에                       ② 증상이 호전되어서                       ③ 효과가 없는 것 같아서  
 ④ 비용 때문에                               ⑤ 기타 \_\_\_\_\_

5. (☞ 4 번 문항에서 '아니오'를 표시하신 분만) 폐경기에 호르몬 치료를 받지 않은 이유는 무엇입니까?

모두 표시해 주십시오

- ① 부작용이 걱정되어서       ② 효과가 없을 것 같아서       ③ 정보가 부족해서  
 ④ 건강관리에 관심이 없어서       ⑤ 증상이 거의 없어서       ⑥ 비용 때문에  
 ⑦ 기타 \_\_\_\_\_

6. 최소한 한달 이상 폐경증상 예방 및 완화를 위해 보완대체요법을 사용해 보신적이 있습니까?

- 예 (☞ 6-1번으로 가십시오)       아니오 (☞ 7번으로 가십시오)

6-1. 사용해 본 적 있는 보완대체요법을 모두 표시(v)해 주십시오

- 운동요법       마사지       단전호흡 (예: 명상, 요가)  
 향기요법 (아로마테라피)       한방요법 (예: 침술, 한약)       심리치료  
 천연 식물성 호르몬제       태반주사 요법       기타 \_\_\_\_\_  
 비타민, 영양제

6-2. 복용해 본 적 있는 비타민, 영양제를 모두 표시(v)해 주십시오

- 종합 비타민 및 무기질 제품       오메가-3 지방산       칼슘  
 글루코사민       감마리놀렌산       엽산  
 철분제       비타민 B       비타민 C  
 비타민 D       비타민 E       코엔자임 큐  
 기타 \_\_\_\_\_

건강기능 식품

6-3. 복용해 본 적 있는 건강기능 식품을 모두 표시(v)해 주십시오

- 이소플라본 (콩 식품 포함)       달맞이꽃 종자유       로얄제리  
 홍삼       인삼       석류 및 석류음료  
 아마씨 오일       칩즙       알로에 제품  
 클로렐라       각종 차 (허브차, 녹차, 홍차)  
 백수오       기타 \_\_\_\_\_

**6-4. 보완대체요법을 사용하게 된 계기를 모두 표시해 주십시오**

- |                                         |                                       |                                     |
|-----------------------------------------|---------------------------------------|-------------------------------------|
| <input type="checkbox"/> ① 가족/친구/이웃의 추천 | <input type="checkbox"/> ② 인터넷 검색을 통해 | <input type="checkbox"/> ③ 텔레비전을 통해 |
| <input type="checkbox"/> ④ 라디오를 통해      | <input type="checkbox"/> ⑤ 잡지/신문을 통해  | <input type="checkbox"/> ⑥ 의사 추천    |
| <input type="checkbox"/> ⑦ 한의사 추천       | <input type="checkbox"/> ⑧ 약사 추천      | <input type="checkbox"/> ⑨ 영양사 추천   |
| <input type="checkbox"/> ⑩ 자신이 원해서      | <input type="checkbox"/> ⑪ 기타 _____   |                                     |

**6-5. 보완대체요법이 폐경 증상 완화 및 전반적인 건강 증진에 도움이 되었다고 생각 하십니까?**

- ① 전혀 그렇지 않다     ② 그렇지 않다     ③ 그렇다     ④ 매우 그렇다

**6-6. 사용 전 보완대체요법에 대한 효용과 안전성에 대한 정보를 충분히 얻었습니까?**

- ① 전혀 그렇지 않다     ② 그렇지 않다     ③ 그렇다     ④ 매우 그렇다

**6-7. 만약 사용을 중단 하셨다면, 중단 이유는 무엇입니까? 모두 표시해 주십시오**

- |                                    |                                      |                                         |
|------------------------------------|--------------------------------------|-----------------------------------------|
| <input type="checkbox"/> ① 부작용 때문에 | <input type="checkbox"/> ② 증상이 호전되어서 | <input type="checkbox"/> ③ 효과가 없는 것 같아서 |
| <input type="checkbox"/> ④ 비용 때문에  | <input type="checkbox"/> ⑤ 기타 _____  |                                         |

**7. (☞ 6번 문항에서 '아니오' 를 표시 하신 분만) 폐경기 관리를 위해 보완대체요법을 사용하지 않았다면, 그 이유는 무엇입니까? 모두 표시해 주십시오**

- |                                                                                                                   |                                         |                                     |
|-------------------------------------------------------------------------------------------------------------------|-----------------------------------------|-------------------------------------|
| <input type="checkbox"/> ① 부작용이 걱정되어서                                                                             | <input type="checkbox"/> ② 효과가 없을 것 같아서 | <input type="checkbox"/> ③ 정보가 부족해서 |
| <input type="checkbox"/> ④ 건강관리에 관심이 없어서                                                                          | <input type="checkbox"/> ⑤ 증상이 거의 없어서   | <input type="checkbox"/> ⑥ 비용 때문에   |
| <input type="checkbox"/> ⑦ 기타 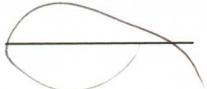 |                                         |                                     |

**♣ 설문에 참여해주셔서 대단히 감사합니다 ♣**
